# Supplementary material for: Cost-effectiveness of Recurrent Dupuytren Contracture Treatment
Source: PubMed Central journal article supplement (PMC7545302; doi:10.1001/jamanetworkopen.2020.19861), 2020-10-08

## Supplemental Online Content

Yoon AP, Kane RL, Hutton DW, Chung KC. Cost-effectiveness of recurrent Dupuytren contracture treatment. *JAMA Netw Open*. 2020;3(10):e2019861. doi:10.1001/jamanetworkopen.2020.19861

**eTable 1.** One-way Sensitivity Analysis for Single-Joint Contracture From Societal Perspective of the Preferred Treatment Strategy

**eTable 2.** Quality-Adjusted Life-Year and Incremental Cost-Effectiveness Ratio for Single-Joint Contracture from Health-Sector Perspective

**eTable 3.** Quality-Adjusted Life-Year and Incremental Cost-Effectiveness Ratio for 2-Joint Contracture from Societal Perspective

**eTable 4.** One-way Sensitivity Analysis for 2-Joint Contracture From Societal Perspective of the Preferred Treatment Strategy

**eFigure 1.** Cost-effectiveness Plane

**eFigure 2.** Two MCP Joint Cost-effectiveness Acceptability Curve

**eFigure 3.** Two PIP Joint Cost-effectiveness Acceptability Curve

This supplemental material has been provided by the authors to give readers additional information about their work.

**eTable 1: One-way Sensitivity Analysis for Single-Joint Contracture From Societal Perspective of the Preferred Treatment Strategy†**

|                                 | MCP Joint Low Severity Contracture |     |     |      |     |     | MCP Joint High Severity Contracture |     |     |      |     |     | PIP Joint Low Severity Contracture |     |     |      |     |     | PIP Joint High Severity Contracture |     |     |      |     |     |    |     |     |
|---------------------------------|------------------------------------|-----|-----|------|-----|-----|-------------------------------------|-----|-----|------|-----|-----|------------------------------------|-----|-----|------|-----|-----|-------------------------------------|-----|-----|------|-----|-----|----|-----|-----|
|                                 | Low                                |     |     | High |     |     | Low                                 |     |     | High |     |     | Low                                |     |     | High |     |     | Low                                 |     |     | High |     |     |    |     |     |
|                                 | 50                                 | 100 | 150 | 50   | 100 | 150 | 50                                  | 100 | 150 | 50   | 100 | 150 | 50                                 | 100 | 150 | 50   | 100 | 150 | 50                                  | 100 | 150 | 50   | 100 | 150 |    |     |     |
| Willingness to Pay (1000's \$)  | 50                                 | 100 | 150 | 50   | 100 | 150 | 50                                  | 100 | 150 | 50   | 100 | 150 | 50                                 | 100 | 150 | 50   | 100 | 150 | 50                                  | 100 | 150 | 50   | 100 | 150 | 50 | 100 | 150 |
| Age                             | 26                                 | 26  | 26  | 26   | 26  | 26  | 26                                  | 24  | 27  | 26   | 27  | 27  | 26                                 | 26  | 26  | 26   | 26  | 24  | 26                                  | 26  | 26  | 26   | 26  | 26  |    |     |     |
| Probability of Death            | 26                                 | 26  | 26  | 26   | 26  | 26  | 26                                  | 24  | 27  | 26   | 24  | 27  | 26                                 | 26  | 26  | 26   | 26  | 26  | 26                                  | 26  | 26  | 26   | 26  | 26  |    |     |     |
| <b>Transition Probabilities</b> |                                    |     |     |      |     |     |                                     |     |     |      |     |     |                                    |     |     |      |     |     |                                     |     |     |      |     |     |    |     |     |
| CCH Success                     | 26                                 | 26  | 26  | 26   | 26  | 26  | 26                                  | 24  | 27  | 26   | 24  | 27  | 26                                 | 26  | 26  | 26   | 26  | 26  | 26                                  | 26  | 26  | 26   | 26  | 26  |    |     |     |
| CCH Recurrence                  | 26                                 | 26  | 26  | 26   | 26  | 26  | 26                                  | 24  | 27  | 26   | 24  | 27  | 26                                 | 26  | 26  | 26   | 26  | 26  | 26                                  | 26  | 26  | 26   | 26  | 26  |    |     |     |
| PNA Success                     | 26                                 | 26  | 26  | 26   | 26  | 26  | 26                                  | 27  | 27  | 26   | 26  | 27  | 26                                 | 26  | 26  | 26   | 26  | 26  | 26                                  | 26  | 26  | 26   | 26  | 26  |    |     |     |
| PNA Recurrence                  | 26                                 | 26  | 26  | 26   | 26  | 26  | 26                                  | 26  | 27  | 26   | 27  | 27  | 26                                 | 26  | 26  | 26   | 26  | 26  | 26                                  | 26  | 26  | 26   | 26  | 26  |    |     |     |
| LF Success                      | 26                                 | 26  | 26  | 26   | 26  | 26  | 26                                  | 26  | 27  | 26   | 27  | 27  | 26                                 | 26  | 26  | 26   | 26  | 26  | 26                                  | 26  | 26  | 26   | 26  | 26  |    |     |     |
| LF Recurrence                   | 26                                 | 26  | 26  | 26   | 26  | 26  | 26                                  | 27  | 27  | 26   | 26  | 27  | 26                                 | 26  | 26  | 26   | 26  | 26  | 26                                  | 26  | 26  | 26   | 26  | 26  |    |     |     |
| <b>Direct Cost</b>              |                                    |     |     |      |     |     |                                     |     |     |      |     |     |                                    |     |     |      |     |     |                                     |     |     |      |     |     |    |     |     |
| CCH clinic visit                | 26                                 | 26  | 26  | 26   | 26  | 26  | 26                                  | 24  | 27  | 26   | 24  | 27  | 26                                 | 26  | 26  | 26   | 26  | 26  | 26                                  | 26  | 26  | 26   | 26  | 26  |    |     |     |
| CCH medication                  | 26                                 | 26  | 26  | 26   | 26  | 26  | 26                                  | 24  | 27  | 26   | 24  | 27  | 26                                 | 26  | 26  | 26   | 26  | 26  | 26                                  | 26  | 26  | 26   | 26  | 26  |    |     |     |
| CCH manipulation visit          | 26                                 | 26  | 26  | 26   | 26  | 26  | 26                                  | 24  | 27  | 26   | 24  | 27  | 26                                 | 26  | 26  | 26   | 26  | 26  | 26                                  | 26  | 26  | 26   | 26  | 26  |    |     |     |
| CCH hand therapy                | 26                                 | 26  | 26  | 26   | 26  | 26  | 26                                  | 24  | 27  | 26   | 24  | 27  | 26                                 | 26  | 26  | 26   | 26  | 26  | 26                                  | 26  | 26  | 26   | 26  | 26  |    |     |     |
| PNA procedure                   | 26                                 | 26  | 26  | 26   | 26  | 26  | 26                                  | 24  | 27  | 26   | 24  | 27  | 26                                 | 26  | 26  | 26   | 26  | 26  | 26                                  | 26  | 26  | 26   | 26  | 26  |    |     |     |
| PNA hand therapy                | 26                                 | 26  | 26  | 26   | 26  | 26  | 26                                  | 24  | 27  | 26   | 24  | 27  | 26                                 | 26  | 26  | 26   | 26  | 26  | 26                                  | 26  | 26  | 26   | 26  | 26  |    |     |     |
| LF procedure                    | 26                                 | 26  | 26  | 26   | 26  | 26  | 26                                  | 24  | 27  | 26   | 24  | 27  | 26                                 | 26  | 26  | 26   | 26  | 26  | 26                                  | 26  | 26  | 26   | 26  | 26  |    |     |     |
| LF anesthesia                   | 26                                 | 26  | 26  | 26   | 26  | 26  | 26                                  | 24  | 27  | 26   | 24  | 27  | 26                                 | 26  | 26  | 26   | 26  | 26  | 26                                  | 26  | 26  | 26   | 26  | 26  |    |     |     |
| LF facility fee                 | 26                                 | 26  | 26  | 26   | 26  | 26  | 26                                  | 27  | 27  | 26   | 24  | 27  | 26                                 | 26  | 26  | 26   | 26  | 26  | 26                                  | 26  | 26  | 26   | 26  | 26  |    |     |     |
| LF hand therapy                 | 26                                 | 26  | 26  | 26   | 26  | 26  | 26                                  | 24  | 27  | 26   | 24  | 27  | 26                                 | 26  | 26  | 26   | 26  | 26  | 26                                  | 26  | 26  | 26   | 26  | 26  |    |     |     |
| <b>Indirect Cost</b>            |                                    |     |     |      |     |     |                                     |     |     |      |     |     |                                    |     |     |      |     |     |                                     |     |     |      |     |     |    |     |     |
| CCH days off work               | 26                                 | 26  | 26  | 26   | 26  | 26  | 26                                  | 24  | 27  | 26   | 24  | 27  | 26                                 | 26  | 26  | 26   | 26  | 26  | 26                                  | 26  | 26  | 26   | 26  | 26  |    |     |     |
| PNA days off work               | 26                                 | 26  | 26  | 26   | 26  | 26  | 26                                  | 24  | 27  | 26   | 27  | 27  | 26                                 | 26  | 26  | 26   | 26  | 26  | 26                                  | 26  | 26  | 26   | 26  | 26  |    |     |     |
| LF days off work                | 26                                 | 26  | 11  | 26   | 26  | 26  | 26                                  | 27  | 27  | 26   | 26  | 27  | 26                                 | 26  | 26  | 26   | 26  | 26  | 26                                  | 26  | 26  | 26   | 26  | 26  |    |     |     |
| <b>Complication Cost</b>        |                                    |     |     |      |     |     |                                     |     |     |      |     |     |                                    |     |     |      |     |     |                                     |     |     |      |     |     |    |     |     |
| Tendon injury                   | 26                                 | 26  | 26  | 26   | 26  | 26  | 26                                  | 24  | 27  | 26   | 24  | 27  | 26                                 | 26  | 26  | 26   | 26  | 26  | 26                                  | 26  | 26  | 26   | 26  | 26  |    |     |     |
| Admission                       | 26                                 | 26  | 26  | 26   | 26  | 26  | 26                                  | 24  | 27  | 26   | 24  | 27  | 26                                 | 26  | 26  | 26   | 26  | 26  | 26                                  | 26  | 26  | 26   | 26  | 26  |    |     |     |
| Medication allergy              | 26                                 | 26  | 26  | 26   | 26  | 26  | 26                                  | 24  | 27  | 26   | 24  | 27  | 26                                 | 26  | 26  | 26   | 26  | 26  | 26                                  | 26  | 26  | 26   | 26  | 26  |    |     |     |
| Skin tear                       | 26                                 | 26  | 26  | 26   | 26  | 26  | 26                                  | 24  | 27  | 26   | 24  | 27  | 26                                 | 26  | 26  | 26   | 26  | 26  | 26                                  | 26  | 26  | 26   | 26  | 26  |    |     |     |
| Infection                       | 26                                 | 26  | 26  | 26   | 26  | 26  | 26                                  | 24  | 27  | 26   | 24  | 27  | 26                                 | 26  | 26  | 26   | 26  | 26  | 26                                  | 26  | 26  | 26   | 26  | 26  |    |     |     |

|                          |    |    |    |    |    |    |    |    |    |    |    |    |    |    |    |    |    |    |    |    |    |    |    |    |
|--------------------------|----|----|----|----|----|----|----|----|----|----|----|----|----|----|----|----|----|----|----|----|----|----|----|----|
| CRPS                     | 26 | 26 | 26 | 26 | 26 | 26 | 26 | 24 | 27 | 26 | 24 | 27 | 26 | 26 | 26 | 26 | 26 | 26 | 26 | 26 | 26 | 26 | 26 | 26 |
| Nerve injury             | 26 | 26 | 26 | 26 | 26 | 26 | 26 | 24 | 27 | 26 | 24 | 27 | 26 | 26 | 26 | 26 | 26 | 26 | 26 | 26 | 26 | 26 | 26 | 26 |
| Artery injury            | 26 | 26 | 26 | 26 | 26 | 26 | 26 | 24 | 27 | 26 | 24 | 27 | 26 | 26 | 26 | 26 | 26 | 26 | 26 | 26 | 26 | 26 | 26 | 26 |
| Hematoma                 | 26 | 26 | 26 | 26 | 26 | 26 | 26 | 24 | 27 | 26 | 24 | 27 | 26 | 26 | 26 | 26 | 26 | 26 | 26 | 26 | 26 | 26 | 26 | 26 |
| <b>Complication Rate</b> |    |    |    |    |    |    |    |    |    |    |    |    |    |    |    |    |    |    |    |    |    |    |    |    |
| Tendon (CCH)             | 26 | 26 | 26 | 26 | 26 | 26 | 26 | 24 | 27 | 26 | 24 | 27 | 26 | 26 | 26 | 26 | 26 | 26 | 26 | 26 | 26 | 26 | 26 | 26 |
| Admission (CCH)          | 26 | 26 | 26 | 26 | 26 | 26 | 26 | 24 | 27 | 26 | 24 | 27 | 26 | 26 | 26 | 26 | 26 | 26 | 26 | 26 | 26 | 26 | 26 | 26 |
| Allergy (CCH)            | 26 | 26 | 26 | 26 | 26 | 26 | 26 | 24 | 27 | 26 | 24 | 27 | 26 | 26 | 26 | 26 | 26 | 26 | 26 | 26 | 26 | 26 | 26 | 26 |
| Skintear (CCH)           | 26 | 26 | 26 | 26 | 26 | 26 | 26 | 24 | 27 | 26 | 24 | 27 | 26 | 26 | 26 | 26 | 26 | 26 | 26 | 26 | 26 | 26 | 26 | 26 |
| Tendon (PNA)             | 26 | 26 | 26 | 26 | 26 | 26 | 26 | 24 | 27 | 26 | 24 | 27 | 26 | 26 | 26 | 26 | 26 | 26 | 26 | 26 | 26 | 26 | 26 | 26 |
| Infection (PNA)          | 26 | 26 | 26 | 26 | 26 | 26 | 26 | 24 | 27 | 26 | 24 | 27 | 26 | 26 | 26 | 26 | 26 | 26 | 26 | 26 | 26 | 26 | 26 | 26 |
| CRPS (PNA)               | 26 | 26 | 26 | 26 | 26 | 26 | 26 | 24 | 27 | 26 | 24 | 27 | 26 | 26 | 26 | 26 | 26 | 26 | 26 | 26 | 26 | 26 | 26 | 26 |
| Nerve injury (PNA)       | 26 | 26 | 26 | 26 | 26 | 26 | 26 | 24 | 27 | 26 | 24 | 27 | 26 | 26 | 26 | 26 | 26 | 26 | 26 | 26 | 26 | 26 | 26 | 26 |
| Artery injury (PNA)      | 26 | 26 | 26 | 26 | 26 | 26 | 26 | 24 | 27 | 26 | 24 | 27 | 26 | 26 | 26 | 26 | 26 | 26 | 26 | 26 | 26 | 26 | 26 | 26 |
| Tendon (LF)              | 26 | 26 | 26 | 26 | 26 | 26 | 26 | 24 | 27 | 26 | 24 | 27 | 26 | 26 | 26 | 26 | 26 | 26 | 26 | 26 | 26 | 26 | 26 | 26 |
| Admission (LF)           | 26 | 26 | 26 | 26 | 26 | 26 | 26 | 24 | 27 | 26 | 24 | 27 | 26 | 26 | 26 | 26 | 26 | 26 | 26 | 26 | 26 | 26 | 26 | 26 |
| Infection (LF)           | 26 | 26 | 26 | 26 | 26 | 26 | 26 | 24 | 27 | 26 | 24 | 27 | 26 | 26 | 26 | 26 | 26 | 26 | 26 | 26 | 26 | 26 | 26 | 26 |
| Nerve injury (LF)        | 26 | 26 | 26 | 26 | 26 | 26 | 26 | 24 | 27 | 26 | 24 | 27 | 26 | 26 | 26 | 26 | 26 | 26 | 26 | 26 | 26 | 26 | 26 | 26 |
| Artery injury (LF)       | 26 | 26 | 26 | 26 | 26 | 26 | 26 | 24 | 27 | 26 | 24 | 27 | 26 | 26 | 26 | 26 | 26 | 26 | 26 | 26 | 26 | 26 | 26 | 26 |
| Hematoma (LF)            | 26 | 26 | 26 | 26 | 26 | 26 | 26 | 24 | 27 | 26 | 24 | 27 | 26 | 26 | 26 | 26 | 26 | 26 | 26 | 26 | 26 | 26 | 26 | 26 |
| Utility (Disease state)  | 26 | 11 | 27 | 26 | 26 | 26 | 26 | 27 | 27 | 26 | 26 | 26 | 26 | 24 | 27 | 26 | 26 | 26 | 26 | 26 | 26 | 26 | 26 | 26 |

† Treatment Types: 11 (PNA→PNA→LF), 26 (PNA→PNA→PNA), 24 (PNA→LF→LF), 27 (LF→LF→LF)

**eTable 2: Quality-Adjusted Life-Year and Incremental Cost-Effectiveness Ratio for Single-Joint Contracture from Health-Sector Perspective**

| Joint Type and Severity                                                                                                                     | Treatment Combination <sup>1</sup> | Average Total Cost (SD <sup>†</sup> ), \$ | Average Lifetime QALYs <sup>2</sup> (SD <sup>†</sup> ) | ICER <sup>3</sup> (MCSE <sup>‡</sup> ),\$/QALY |
|---------------------------------------------------------------------------------------------------------------------------------------------|------------------------------------|-------------------------------------------|--------------------------------------------------------|------------------------------------------------|
| MCP Joint Low                                                                                                                               | PNA→PNA→PNA                        | 2,955 (454)                               | 15.09 (4.95)                                           |                                                |
|                                                                                                                                             | PNA→PNA→LF                         | 6,232 (1,523)                             | 15.12 (4.97)                                           | 114,062 (11,000)                               |
|                                                                                                                                             | LF→LF→LF                           | 13,345 (2,732)                            | 15.17 (4.98)                                           | 130,753 (18,000)                               |
| MCP Joint High                                                                                                                              | PNA→PNA→PNA                        | 3,076 (378)                               | 14.64 (4.80)                                           |                                                |
|                                                                                                                                             | PNA→PNA→LF                         | 6,660 (1,276)                             | 14.72 (4.83)                                           | 43,635 (4,500)                                 |
|                                                                                                                                             | LF→LF→LF                           | 13,647 (2,641)                            | 14.88 (4.87)                                           | 45,034 (9,000)                                 |
| PIP Joint Low                                                                                                                               | PNA→PNA→PNA                        | 3,113 (329)                               | 15.03 (4.95)                                           |                                                |
|                                                                                                                                             | PNA→PNA→LF                         | 6,788 (1,115)                             | 15.06 (4.95)                                           | 117,877 (8,000)                                |
|                                                                                                                                             | LF→LF→LF                           | 14,114 (2,316)                            | 15.12 (4.97)                                           | 119,422 (22,000)                               |
| PIP Joint High                                                                                                                              | PNA→PNA→PNA                        | 3,164 (280)                               | 14.59 (4.80)                                           |                                                |
|                                                                                                                                             | PNA→PNA→LF                         | 6,968 (956)                               | 14.62 (4.80)                                           | 179,610 (7,000)                                |
|                                                                                                                                             | LF→LF→LF                           | 14,972 (1,741)                            | 14.66 (4.82)                                           | 173,193 (7,500)                                |
| <sup>1</sup> PNA: Percutaneous Needle Aponeurotomy; LF: Limited Fasciectomy; CCH: Collagenase Clostridium Histolyticum                      |                                    |                                           |                                                        |                                                |
| <sup>2</sup> QALY: Quality-Adjusted Life Years                                                                                              |                                    |                                           |                                                        |                                                |
| <sup>3</sup> ICER: Incremental Cost-Effectiveness Ratio; ICER compared to next best treatment combination with highest net monetary benefit |                                    |                                           |                                                        |                                                |
| <sup>†</sup> SD: Standard Deviation                                                                                                         |                                    |                                           |                                                        |                                                |
| <sup>‡</sup> MCSE: Monte Carlo Standard Error                                                                                               |                                    |                                           |                                                        |                                                |

**eTable 3: Quality-Adjusted Life-Year and Incremental Cost-Effectiveness Ratio for 2-Joint Contracture from Societal Perspective**

| Joint Type and Severity                                                                                                                     | Treatment Combination <sup>1</sup> | Average Total Cost (SD <sup>†</sup> ), \$ | Average Lifetime QALYs <sup>2</sup> (SD <sup>†</sup> ) | ICER <sup>3</sup> (MCSE <sup>‡</sup> ),\$/QALY |
|---------------------------------------------------------------------------------------------------------------------------------------------|------------------------------------|-------------------------------------------|--------------------------------------------------------|------------------------------------------------|
| MCP Joint Low                                                                                                                               | PNA→PNA→PNA                        | 3,339 (544)                               | 14.82 (4.85)                                           |                                                |
|                                                                                                                                             | PNA→PNA→LF                         | 9,700 (4,070)                             | 14.87 (4.87)                                           | 120,999 (36,000)                               |
|                                                                                                                                             | LF→LF→LF                           | 26,235 (6,926)                            | 14.97 (4.90)                                           | 166,081 (24,500)                               |
| MCP Joint High                                                                                                                              | PNA→PNA→PNA                        | 3,512 (462)                               | 13.98 (4.57)                                           |                                                |
|                                                                                                                                             | PNA→PNA→LF                         | 11,501 (3,711)                            | 14.13 (4.61)                                           | 52,581 (6,600)                                 |
|                                                                                                                                             | LF→LF→LF                           | 27,360 (7,016)                            | 14.42 (4.70)                                           | 55,241 (13,500)                                |
| PIP Joint Low                                                                                                                               | PNA→PNA→PNA                        | 3,567 (399)                               | 14.59 (4.78)                                           |                                                |
|                                                                                                                                             | PNA→PNA→LF                         | 12,072 (3,267)                            | 14.65 (4.80)                                           | 127,131 (14,500)                               |
|                                                                                                                                             | LF→LF→LF                           | 28,802 (6,583)                            | 14.79 (4.83)                                           | 127,102 (21,667)                               |
| PIP Joint High                                                                                                                              | PNA→PNA→PNA                        | 3,640 (338)                               | 13.63 (4.47)                                           |                                                |
|                                                                                                                                             | PNA→PNA→LF                         | 12,867 (2,694)                            | 13.67 (4.48)                                           | 200,653 (12,000)                               |
|                                                                                                                                             | LF→LF→LF                           | 32,386 (5,398)                            | 13.78 (4.52)                                           | 194,195 (17,333)                               |
| <sup>1</sup> PNA: Percutaneous Needle Aponeurotomy; LF: Limited Fasciectomy; CCH: Collagenase Clostridium Histolyticum                      |                                    |                                           |                                                        |                                                |
| <sup>2</sup> QALY: Quality-Adjusted Life Years                                                                                              |                                    |                                           |                                                        |                                                |
| <sup>3</sup> ICER: Incremental Cost-Effectiveness Ratio; ICER compared to next best treatment combination with highest net monetary benefit |                                    |                                           |                                                        |                                                |
| <sup>†</sup> SD: Standard Deviation                                                                                                         |                                    |                                           |                                                        |                                                |
| <sup>‡</sup> MCSE: Monte Carlo Standard Error                                                                                               |                                    |                                           |                                                        |                                                |

**eTable 4: One-way Sensitivity Analysis 2-Joint Contracture From Societal Perspective of the Preferred Treatment Strategy†**

|                                 | MCP Joint Low Severity Contracture |     |     |      |     |     | MCP Joint High Severity Contracture |     |     |      |     |     | PIP Joint Low Severity Contracture |     |     |      |     |     | PIP Joint High Severity Contracture |     |     |      |     |     |    |
|---------------------------------|------------------------------------|-----|-----|------|-----|-----|-------------------------------------|-----|-----|------|-----|-----|------------------------------------|-----|-----|------|-----|-----|-------------------------------------|-----|-----|------|-----|-----|----|
|                                 | Low                                |     |     | High |     |     | Low                                 |     |     | High |     |     | Low                                |     |     | High |     |     | Low                                 |     |     | High |     |     |    |
| Willingness to Pay (1000's \$)  | 50                                 | 100 | 150 | 50   | 100 | 150 | 50                                  | 100 | 150 | 50   | 100 | 150 | 50                                 | 100 | 150 | 50   | 100 | 150 | 50                                  | 100 | 150 | 50   | 100 | 150 |    |
| Age                             | 26                                 | 26  | 11  | 26   | 11  | 27  | 26                                  | 27  | 27  | 26   | 27  | 27  | 26                                 | 26  | 27  | 26   | 27  | 27  | 26                                  | 26  | 26  | 26   | 26  | 22  | 27 |
| Probability of Death            | 26                                 | 26  | 11  | 26   | 26  | 11  | 26                                  | 27  | 27  | 26   | 27  | 27  | 26                                 | 26  | 27  | 26   | 26  | 27  | 26                                  | 26  | 26  | 26   | 26  | 26  | 26 |
| <b>Transition Probabilities</b> |                                    |     |     |      |     |     |                                     |     |     |      |     |     |                                    |     |     |      |     |     |                                     |     |     |      |     |     |    |
| CCH Success                     | 26                                 | 26  | 11  | 26   | 26  | 11  | 26                                  | 27  | 27  | 26   | 27  | 27  | 26                                 | 26  | 27  | 26   | 26  | 27  | 26                                  | 26  | 26  | 26   | 26  | 26  | 26 |
| CCH Recurrence                  | 26                                 | 26  | 11  | 26   | 26  | 11  | 26                                  | 27  | 27  | 26   | 27  | 27  | 26                                 | 26  | 27  | 26   | 26  | 27  | 26                                  | 26  | 26  | 26   | 26  | 26  | 26 |
| PNA Success                     | 26                                 | 26  | 27  | 26   | 26  | 26  | 24                                  | 27  | 27  | 26   | 27  | 27  | 26                                 | 26  | 27  | 26   | 26  | 24  | 26                                  | 26  | 26  | 26   | 26  | 26  | 26 |
| PNA Recurrence                  | 26                                 | 26  | 11  | 26   | 26  | 27  | 26                                  | 27  | 27  | 24   | 27  | 27  | 26                                 | 26  | 24  | 26   | 26  | 27  | 26                                  | 26  | 26  | 26   | 26  | 26  | 26 |
| LF Success                      | 26                                 | 26  | 26  | 26   | 11  | 27  | 26                                  | 27  | 27  | 27   | 27  | 27  | 26                                 | 26  | 26  | 26   | 24  | 27  | 26                                  | 26  | 26  | 26   | 26  | 26  | 27 |
| LF Recurrence                   | 26                                 | 11  | 27  | 26   | 26  | 26  | 27                                  | 27  | 27  | 26   | 27  | 27  | 26                                 | 26  | 27  | 26   | 26  | 26  | 26                                  | 26  | 26  | 26   | 26  | 26  | 26 |
| <b>Direct Cost</b>              |                                    |     |     |      |     |     |                                     |     |     |      |     |     |                                    |     |     |      |     |     |                                     |     |     |      |     |     |    |
| CCH clinic visit                | 26                                 | 26  | 11  | 26   | 26  | 11  | 26                                  | 27  | 27  | 26   | 27  | 27  | 26                                 | 26  | 27  | 26   | 26  | 27  | 26                                  | 26  | 26  | 26   | 26  | 26  | 26 |
| CCH medication                  | 26                                 | 26  | 11  | 26   | 26  | 11  | 26                                  | 27  | 27  | 26   | 27  | 27  | 26                                 | 26  | 27  | 26   | 26  | 27  | 26                                  | 26  | 26  | 26   | 26  | 26  | 26 |
| CCH manipulation visit          | 26                                 | 26  | 11  | 26   | 26  | 11  | 26                                  | 27  | 27  | 26   | 27  | 27  | 26                                 | 26  | 27  | 26   | 26  | 27  | 26                                  | 26  | 26  | 26   | 26  | 26  | 26 |
| CCH hand therapy                | 26                                 | 26  | 11  | 26   | 26  | 11  | 26                                  | 27  | 27  | 26   | 27  | 27  | 26                                 | 26  | 27  | 26   | 26  | 27  | 26                                  | 26  | 26  | 26   | 26  | 26  | 26 |
| PNA procedure                   | 26                                 | 26  | 11  | 26   | 26  | 11  | 26                                  | 27  | 27  | 26   | 27  | 27  | 26                                 | 26  | 27  | 26   | 26  | 27  | 26                                  | 26  | 26  | 26   | 26  | 26  | 26 |
| PNA hand therapy                | 26                                 | 26  | 11  | 26   | 26  | 11  | 26                                  | 27  | 27  | 26   | 27  | 27  | 26                                 | 26  | 27  | 26   | 26  | 27  | 26                                  | 26  | 26  | 26   | 26  | 26  | 26 |
| LF procedure                    | 26                                 | 26  | 11  | 26   | 26  | 11  | 26                                  | 27  | 27  | 26   | 27  | 27  | 26                                 | 26  | 27  | 26   | 26  | 27  | 26                                  | 26  | 26  | 26   | 26  | 26  | 26 |
| LF anesthesia                   | 26                                 | 26  | 11  | 26   | 26  | 11  | 26                                  | 27  | 27  | 26   | 27  | 27  | 26                                 | 26  | 27  | 26   | 26  | 27  | 26                                  | 26  | 26  | 26   | 26  | 26  | 26 |
| LF facility fee                 | 26                                 | 26  | 11  | 26   | 26  | 11  | 26                                  | 27  | 27  | 26   | 27  | 27  | 26                                 | 26  | 27  | 26   | 26  | 27  | 26                                  | 26  | 26  | 26   | 26  | 26  | 26 |
| LF hand therapy                 | 26                                 | 26  | 11  | 26   | 26  | 11  | 26                                  | 27  | 27  | 26   | 27  | 27  | 26                                 | 26  | 27  | 26   | 26  | 27  | 26                                  | 26  | 26  | 26   | 26  | 26  | 26 |
| <b>Indirect Cost</b>            |                                    |     |     |      |     |     |                                     |     |     |      |     |     |                                    |     |     |      |     |     |                                     |     |     |      |     |     |    |
| CCH days off work               | 26                                 | 26  | 11  | 26   | 26  | 11  | 26                                  | 27  | 27  | 26   | 27  | 27  | 26                                 | 26  | 27  | 26   | 26  | 27  | 26                                  | 26  | 26  | 26   | 26  | 26  | 26 |
| PNA days off work               | 26                                 | 26  | 11  | 26   | 26  | 27  | 26                                  | 27  | 27  | 27   | 27  | 27  | 26                                 | 26  | 27  | 26   | 27  | 27  | 26                                  | 26  | 26  | 26   | 26  | 26  | 22 |
| LF days off work                | 26                                 | 11  | 27  | 26   | 26  | 26  | 27                                  | 27  | 27  | 26   | 27  | 27  | 26                                 | 27  | 27  | 26   | 26  | 26  | 26                                  | 26  | 27  | 26   | 26  | 26  | 26 |
| <b>Complication Cost</b>        |                                    |     |     |      |     |     |                                     |     |     |      |     |     |                                    |     |     |      |     |     |                                     |     |     |      |     |     |    |
| Tendon injury                   | 26                                 | 26  | 11  | 26   | 26  | 11  | 26                                  | 27  | 27  | 26   | 27  | 27  | 26                                 | 26  | 27  | 26   | 26  | 27  | 26                                  | 26  | 26  | 26   | 26  | 26  | 26 |
| Admission                       | 26                                 | 26  | 11  | 26   | 26  | 11  | 26                                  | 27  | 27  | 26   | 27  | 27  | 26                                 | 26  | 27  | 26   | 26  | 27  | 26                                  | 26  | 26  | 26   | 26  | 26  | 26 |
| Medication allergy              | 26                                 | 26  | 11  | 26   | 26  | 11  | 26                                  | 27  | 27  | 26   | 27  | 27  | 26                                 | 26  | 27  | 26   | 26  | 27  | 26                                  | 26  | 26  | 26   | 26  | 26  | 26 |

|                          |    |    |    |    |    |    |    |    |    |    |    |    |    |    |    |    |    |    |    |    |    |    |    |    |
|--------------------------|----|----|----|----|----|----|----|----|----|----|----|----|----|----|----|----|----|----|----|----|----|----|----|----|
| Skin tear                | 26 | 26 | 11 | 26 | 26 | 11 | 26 | 27 | 27 | 26 | 27 | 27 | 26 | 26 | 27 | 26 | 26 | 27 | 26 | 26 | 26 | 26 | 26 | 26 |
| Infection                | 26 | 26 | 11 | 26 | 26 | 11 | 26 | 27 | 27 | 26 | 27 | 27 | 26 | 26 | 27 | 26 | 26 | 27 | 26 | 26 | 26 | 26 | 26 | 26 |
| CRPS                     | 26 | 26 | 11 | 26 | 26 | 11 | 26 | 27 | 27 | 26 | 27 | 27 | 26 | 26 | 27 | 26 | 26 | 27 | 26 | 26 | 26 | 26 | 26 | 26 |
| Nerve injury             | 26 | 26 | 11 | 26 | 26 | 11 | 26 | 27 | 27 | 26 | 27 | 27 | 26 | 26 | 27 | 26 | 26 | 27 | 26 | 26 | 26 | 26 | 26 | 26 |
| Artery injury            | 26 | 26 | 11 | 26 | 26 | 11 | 26 | 27 | 27 | 26 | 27 | 27 | 26 | 26 | 27 | 26 | 26 | 27 | 26 | 26 | 26 | 26 | 26 | 26 |
| Hematoma                 | 26 | 26 | 11 | 26 | 26 | 11 | 26 | 27 | 27 | 26 | 27 | 27 | 26 | 26 | 27 | 26 | 26 | 27 | 26 | 26 | 26 | 26 | 26 | 26 |
| <b>Complication Rate</b> |    |    |    |    |    |    |    |    |    |    |    |    |    |    |    |    |    |    |    |    |    |    |    |    |
| Tendon (CCH)             | 26 | 26 | 11 | 26 | 26 | 11 | 26 | 27 | 27 | 26 | 27 | 27 | 26 | 26 | 27 | 26 | 26 | 27 | 26 | 26 | 26 | 26 | 26 | 26 |
| Admission (CCH)          | 26 | 26 | 11 | 26 | 26 | 11 | 26 | 27 | 27 | 26 | 27 | 27 | 26 | 26 | 27 | 26 | 26 | 27 | 26 | 26 | 26 | 26 | 26 | 26 |
| Allergy (CCH)            | 26 | 26 | 11 | 26 | 26 | 11 | 26 | 27 | 27 | 26 | 27 | 27 | 26 | 26 | 27 | 26 | 26 | 27 | 26 | 26 | 26 | 26 | 26 | 26 |
| Skin tear (CCH)          | 26 | 26 | 11 | 26 | 26 | 11 | 26 | 27 | 27 | 26 | 27 | 27 | 26 | 26 | 27 | 26 | 26 | 27 | 26 | 26 | 26 | 26 | 26 | 26 |
| Tendon (PNA)             | 26 | 26 | 11 | 26 | 26 | 11 | 26 | 27 | 27 | 26 | 27 | 27 | 26 | 26 | 27 | 26 | 26 | 27 | 26 | 26 | 26 | 26 | 26 | 26 |
| Infection (PNA)          | 26 | 26 | 11 | 26 | 26 | 11 | 26 | 27 | 27 | 26 | 27 | 27 | 26 | 26 | 27 | 26 | 26 | 27 | 26 | 26 | 26 | 26 | 26 | 26 |
| CRPS (PNA)               | 26 | 26 | 11 | 26 | 26 | 11 | 26 | 27 | 27 | 26 | 27 | 27 | 26 | 26 | 27 | 26 | 26 | 27 | 26 | 26 | 26 | 26 | 26 | 26 |
| Nerve injury (PNA)       | 26 | 26 | 11 | 26 | 26 | 11 | 26 | 27 | 27 | 26 | 27 | 27 | 26 | 26 | 27 | 26 | 26 | 27 | 26 | 26 | 26 | 26 | 26 | 26 |
| Artery injury (PNA)      | 26 | 26 | 11 | 26 | 26 | 11 | 26 | 27 | 27 | 26 | 27 | 27 | 26 | 26 | 27 | 26 | 26 | 27 | 26 | 26 | 26 | 26 | 26 | 26 |
| Tendon (LF)              | 26 | 26 | 11 | 26 | 26 | 11 | 26 | 27 | 27 | 26 | 27 | 27 | 26 | 26 | 27 | 26 | 26 | 27 | 26 | 26 | 26 | 26 | 26 | 26 |
| Admission (LF)           | 26 | 26 | 11 | 26 | 26 | 11 | 26 | 27 | 27 | 26 | 27 | 27 | 26 | 26 | 27 | 26 | 26 | 27 | 26 | 26 | 26 | 26 | 26 | 26 |
| Infection (LF)           | 26 | 26 | 11 | 26 | 26 | 11 | 26 | 27 | 27 | 26 | 27 | 27 | 26 | 26 | 27 | 26 | 26 | 27 | 26 | 26 | 26 | 26 | 26 | 26 |
| Nerve injury (LF)        | 26 | 26 | 11 | 26 | 26 | 11 | 26 | 27 | 27 | 26 | 27 | 27 | 26 | 26 | 27 | 26 | 26 | 27 | 26 | 26 | 26 | 26 | 26 | 26 |
| Artery injury (LF)       | 26 | 26 | 11 | 26 | 26 | 11 | 26 | 27 | 27 | 26 | 27 | 27 | 26 | 26 | 27 | 26 | 26 | 27 | 26 | 26 | 26 | 26 | 26 | 26 |
| Hematoma (LF)            | 26 | 26 | 11 | 26 | 26 | 11 | 26 | 27 | 27 | 26 | 27 | 27 | 26 | 26 | 27 | 26 | 26 | 27 | 26 | 26 | 26 | 26 | 26 | 26 |
| Utility (Disease state)  | 26 | 27 | 27 | 26 | 26 | 26 | 27 | 27 | 27 | 26 | 27 | 27 | 26 | 27 | 27 | 26 | 26 | 26 | 26 | 26 | 27 | 26 | 26 | 26 |

† Treatment Types: 11 (PNA→PNA→LF), 22 (LF→PNA→PNA), 26 (PNA→PNA→PNA), 24 (PNA→LF→LF), 27 (LF→LF→LF)

eFigure 1. Cost-effectiveness Plane

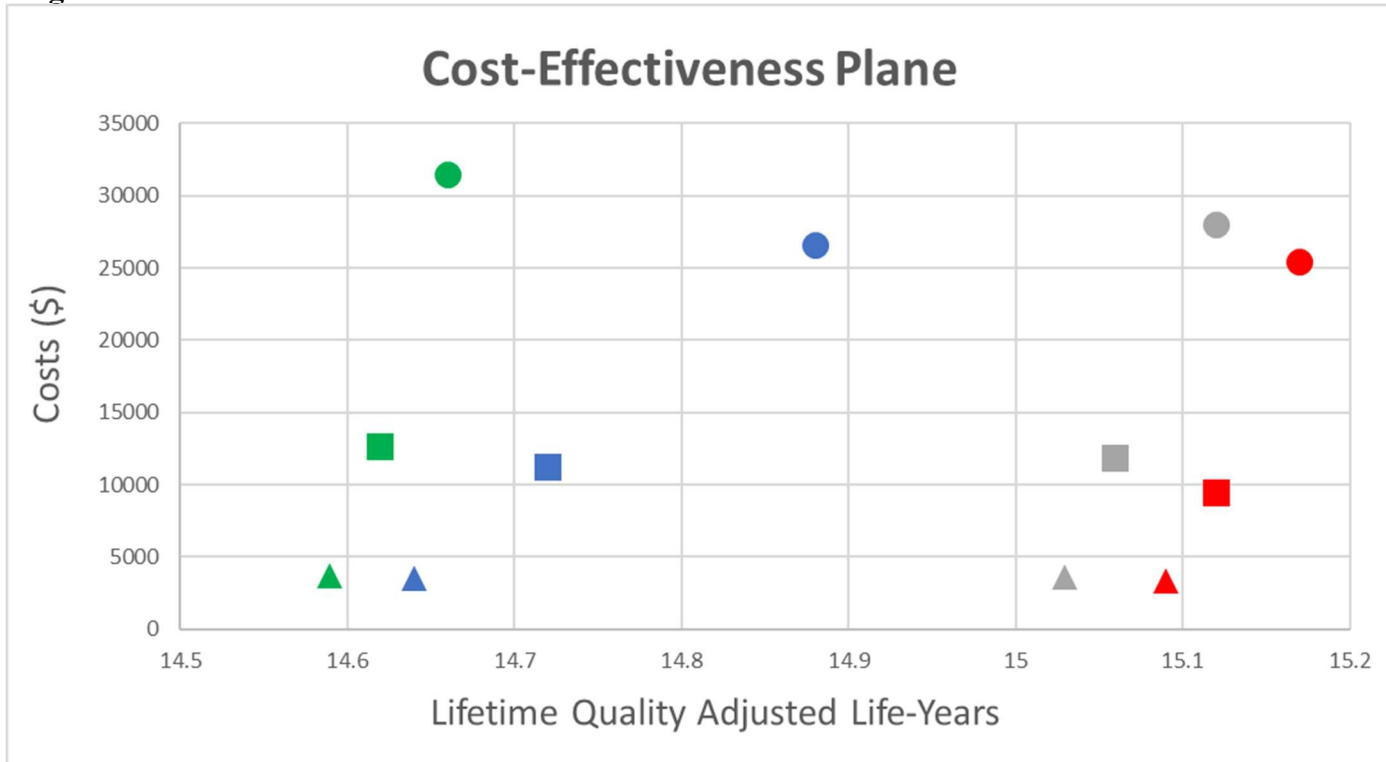

Triangle: PNA→PNA→PNA; Square: PNA→PNA→LF; Circle: LF→LF→LF

Red: MCP joint low severity contracture; Blue: MCP joint high severity contracture; Gray: PIP joint low severity contracture; Green: PIP joint high severity contracture



## eFigure 2. Two MCP Joint Cost-effectiveness Acceptability Curve

Cost-Effectiveness Acceptability Curve for Two MCP Joint Low Severity Contractures

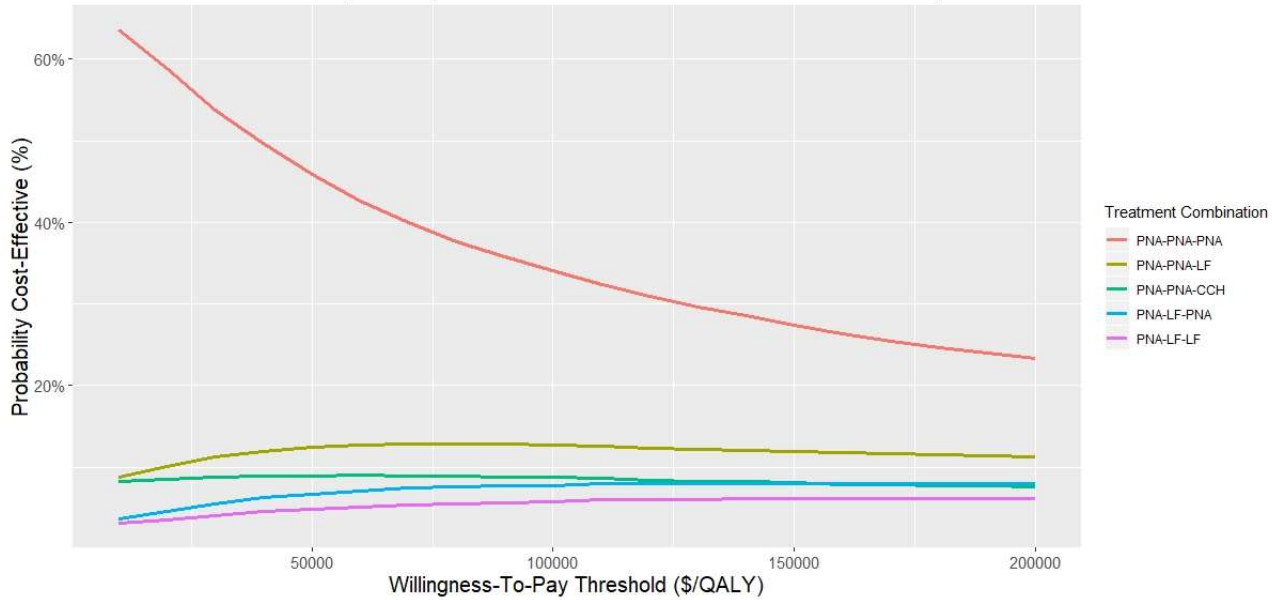

Cost-Effectiveness Acceptability Curve for Two MCP Joint High Severity Contractures

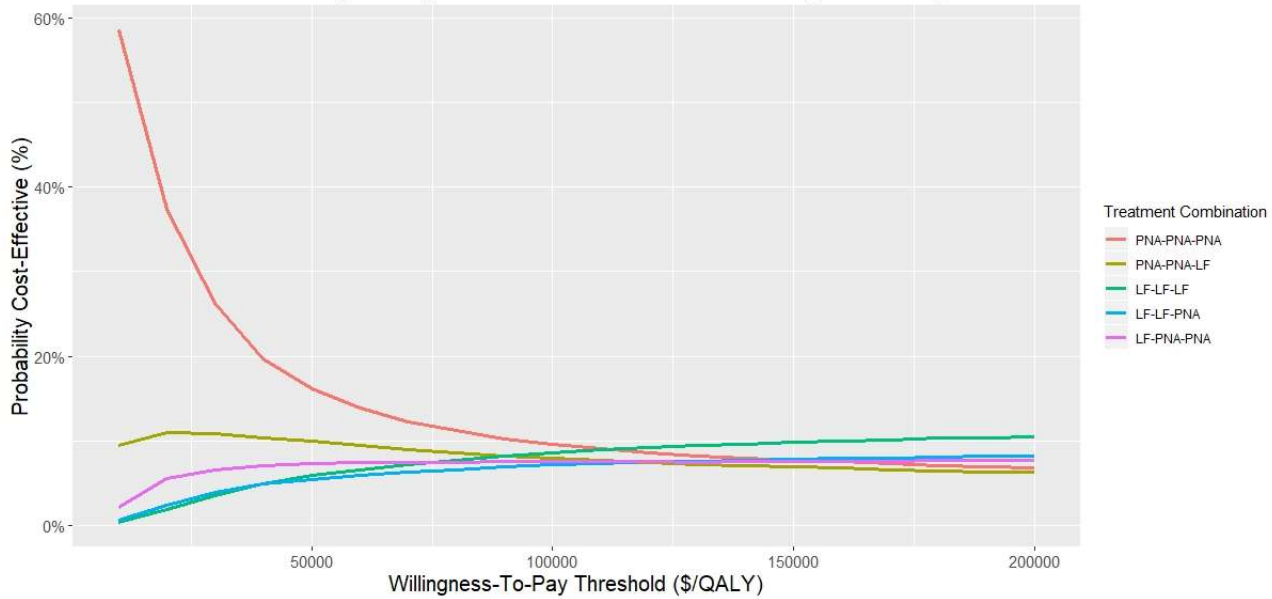

### eFigure 3. Two PIP Joint Cost-effectiveness Acceptability Curve

Cost-Effectiveness Acceptability Curve for Two PIP Joint Low Severity Contractures

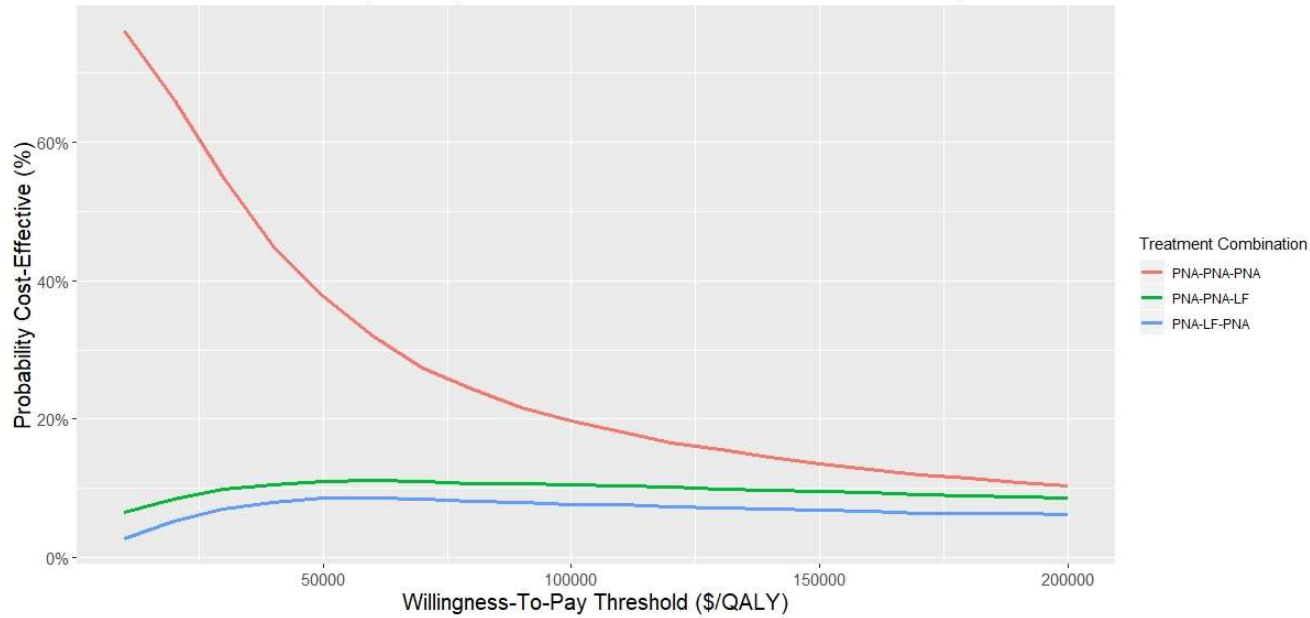

Cost-Effectiveness Acceptability Curve for Two PIP Joint High Severity Contractures

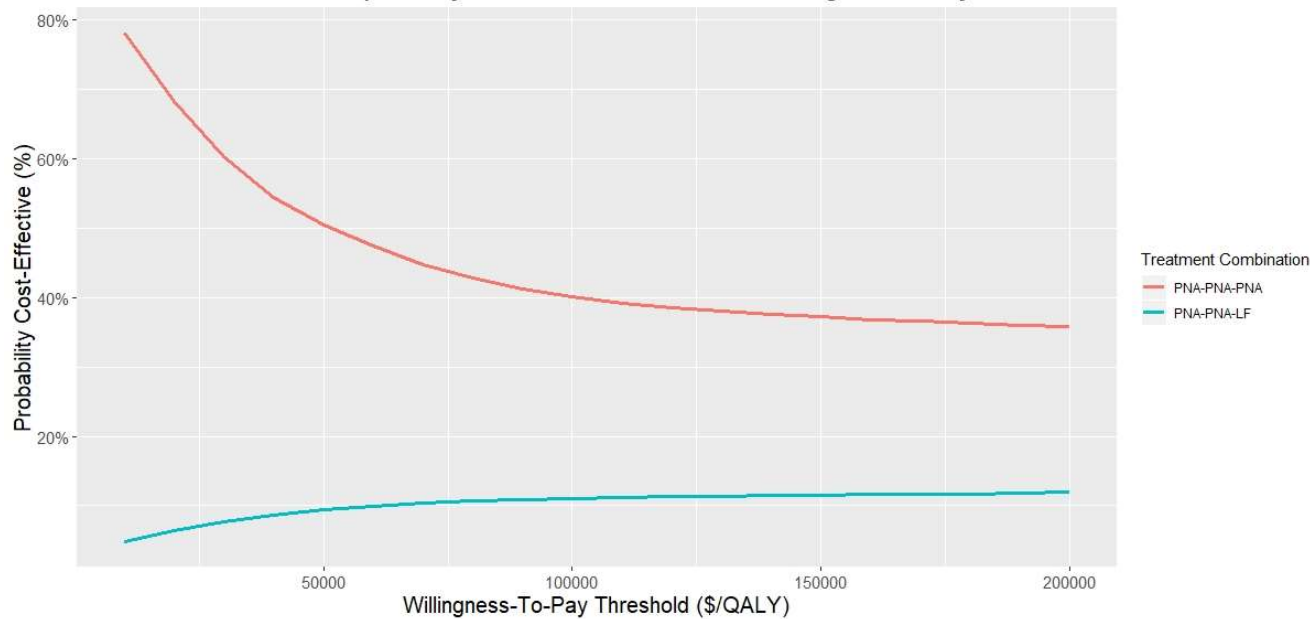

Supplement: jamanetwopen-e2019861-s001.pdf [file jamanetwopen-e2019861-s001.pdf]
